# Supplementary material for: SMASH standardised perioperative management of patients operated with acute abdominal surgery in a high-risk setting
Source: PubMed Central journal article supplement (PMC7110666; doi:10.1186/s13104-020-05030-4), 2020-03-31
Supplement: 13104_2020_5030_MOESM1_ESM.pdf [file 13104_2020_5030_MOESM1_ESM.pdf]

# Emergency Laparotomy

This CRF follows the patient from the decision of surgery and until the patient being discharged from hospital.

When patient is discharged, send form to:  
Contact: Dr. Mattias Prytz, Consultant  
[mattias.prytz@vgregion.se](mailto:mattias.prytz@vgregion.se) tel: +46104353523

Surgical code:  
**JAH00 Emergency Laparotomy**. Add code  
**JAH01** if laparoscopy.

Priority:  
 emergency  
 2 hours  
 6 hours

## PATIENT DATA

### Preoperative- Surgeon liability

Surgery notification: date \_\_\_\_\_ time \_\_\_\_\_

- Latest **surgical** bedside assessment before notification. Time: \_\_\_\_\_
- Reoperation after elective surgery
- Surgery will initiate as laparoscopy

The following are carried out **immediately** after a decision to operate has been taken.

- Antibiotics** given, time: \_\_\_\_\_  
Septic patient- 2:nd dose after 4h.
- EWS-early warning score**  
Register in med journal. score: \_\_\_\_\_
- Arterial Blood Gas** with lactate
- extended blood chemical analyses**.  
Hb, platelet count, white blood count, sodium, potassium, creatinine, CRP, procalcitonin
- Urinary catheter**
- Nasogastric tube**
- Planning** of the continuing pre-operative care in consultation with the responsible anesthetist.  
(All factors that can delay surgery must be eliminated, i.e. shower.)

The following is done **promptly** and must be completed before surgery.

Decide on care restrictions. Specify below if restrictions apply.

- yes
- no

- Relatives contacted**. Reason if not contact \_\_\_\_\_

### Comorbidity

- COPD
- Ischemic heart disease
- Heart failure
- Diabetes
- Kidney failure
- Obesity
- Smoker
- None of the above

Pathological findings and surgical procedure: \_\_\_\_\_

### Post-op complication Surgeon liability (Not to be filled in to early)

A postoperative complication has arisen that....: \_\_\_\_\_ Date when reviewed: \_\_\_\_\_

- 1) is pharmacological treated with: Antiemetics, antipyretics, analgesics, diuretics and/or electrolytes
- 2) is treated with pharmacotherapy not mentioned above (eg blood transfusion or TPN).
- 3a) requires surgical, endoscopic or radiological intervention.
- 3b) requires surgical, endoscopic or radiological intervention in general anesthesia.
- 4a) requires ICU care due to single organ failure.
- 4b) Requires ICU care due to multiorgan failure.
- 5) lead to patient loss of life.

### Peroperative- Anesthetist liability

- Anesthetist preop bedside assessment  
Time \_\_\_\_\_ ASA-classification: \_\_\_\_\_

Ready for theater: \_\_\_\_\_ Anesthesia start: \_\_\_\_\_

Surgery start: \_\_\_\_\_ surgery finish: \_\_\_\_\_

- Thoracic Epidural**  
If the Epidural is not performed, please state the reason below: \_\_\_\_\_

- A-line**
- Noradrenaline**
- RSI**  
**Drug for induction.**  
 Ketamin  
 Propofol

- Central venous catheter**  
Should especially be considered when there is a need for post-care at ICU.

### Goal directed fluid therapy (GDFT):

- CardioQ**
- Lidco-Rapid**
- PPV**
- other** \_\_\_\_\_

**Decision on post-op level of care** after consultation between surgeon and anesthetist.

- Post-op **recovery**
- Post-op **Intensive care unit**  
Reasons for postop-ICU  
\_\_\_\_\_

Anesthesiological complication with postoperative significance

- No complication
- Aspiration
- Other \_\_\_\_\_

Per-operativ  
Competence of Surgeon

- Resident
- Specialist
- Consultant

Per-operativ  
competence of Anesthetist

- Resident
- Specialist
- Consultant

### Post-op-recovery Nurse liability

Recovery start: date \_\_\_\_\_ time \_\_\_\_\_

Recovery finish: date \_\_\_\_\_ time \_\_\_\_\_

The following is performed at recovery before round with anesthesiologist.

- monitoring** standard
- Temperature** \_\_\_\_\_ degrees.
- Chemical blood analyse**, ICU-standard
- Arterial Blood Gas**
- Active temperature control**
- Visual Analog Scale** on arrival: \_\_\_\_\_
- EWS-early warning score**. Register in medical journal. score: \_\_\_\_\_
- Visual Analog Scale** on discharge: \_\_\_\_\_

### Post-op- Anesthetist liability

After approximately **30 minutes** at recovery.

**Assessment bedside by anesthesiologist:**  
Review of treatment goals. Time: \_\_\_\_\_  
Patient should be assessed every two hours unless vital parameters show a completely stable patient.

**Goal directed fluid therapy** post-op:

- Lidco-Rapid
- CardioQ
- other \_\_\_\_\_
- none

Evaluation of **paintreatment** post-op:

- Epidural
- Patient Controlled Analgesia
- TAP-Block
- PainBuster
- Other \_\_\_\_\_

**Care continues at:**

- Surgical ward
- ICU
- Other \_\_\_\_\_

### Post-op surgical ward: Nurse liability

Arrival to ward: date \_\_\_\_\_ Time \_\_\_\_\_

- EWS on arrival. score: \_\_\_\_\_
- EWS 2 h after arrival. score: \_\_\_\_\_
- EWS 4 h after arrival. score: \_\_\_\_\_
- EWS 8 h after arrival. score: \_\_\_\_\_

EWS every 8 hours as long as the responsible surgeon sees the need.

Take **immediate** contact with a surgeon in case of clinical deterioration.

EWS-evaluation terminates at. date: \_\_\_\_\_

Reviewed by: \_\_\_\_\_
